# 1 **Anti-inflammatory properties of chemical probes in human whole** 2 **blood: focus on prostaglandin E<sub>2</sub> production**

3 **Filip Bergqvist<sup>a,b,\*</sup>, Yvonne Sundström<sup>a,b</sup>, Mingmei Shang<sup>a,b</sup>, Iva Gunnarsson<sup>a</sup>, Ingrid**  
4 **Lundberg<sup>a</sup>, Michael Sundström<sup>a,b</sup>, Per-Johan Jakobsson<sup>a,b</sup>, Louise Berg<sup>a,b,\*</sup>**

5 <sup>a</sup>Division of Rheumatology, Department of Medicine, Solna, Karolinska Institutet, and Karolinska  
6 University Hospital, SE-17176, Stockholm, Sweden

7 <sup>b</sup>The Structural Genomic Consortium (SGC), Karolinska Institutet, Stockholm, Sweden

8 \*Corresponding authors. Division of Rheumatology, Department of Medicine, Solna, Karolinska  
9 Institutet, and Karolinska University Hospital, SE-17176, Stockholm, Sweden

10 E-mail address: [Bergqvist.Filip@gmail.com](mailto:Bergqvist.Filip@gmail.com) (F. Bergqvist), [Louise.Berg@ki.se](mailto:Louise.Berg@ki.se) (L. Berg)

## 11 **Abstract**

12 We screened 57 chemical probes, high-quality tool compounds, and relevant clinically used drugs to  
13 investigate their effect on pro-inflammatory prostaglandin E<sub>2</sub> (PGE<sub>2</sub>) production and interleukin-8 (IL-  
14 8) secretion in human whole blood. Freshly drawn blood from healthy volunteers and patients with  
15 systemic lupus erythematosus (SLE) or dermatomyositis was incubated with compounds at 0.1 or 1 μM  
16 and treated with lipopolysaccharide (LPS, 10 μg/mL) to induce a pro-inflammatory condition. Plasma  
17 was collected after 24 hours for lipid profiling using liquid chromatography tandem mass spectrometry  
18 (LC-MS/MS) and IL-8 quantification using enzyme-linked immunosorbent assay (ELISA). Each  
19 compound was tested in at least four donors at one concentration based on prior knowledge of binding  
20 affinities and *in vitro* activity. Our screening suggested that PD0325901 (MEK-1/2 inhibitor), trametinib  
21 (MEK-1/2 inhibitor), and selumetinib (MEK-1 inhibitor) decreased while tofacitinib (JAK inhibitor)  
22 increased PGE<sub>2</sub> production. These findings were validated by concentration-response experiment in two  
23 donors. Moreover, the tested MEK inhibitors decreased thromboxane B<sub>2</sub> (TXB<sub>2</sub>) production and IL-8  
24 secretion. We also investigated the lysophosphatidylcholine (LPC) profile in plasma from treated whole  
25 blood as these lipids are potentially important mediators in inflammation, and we did not observe any  
26 changes in LPC profiles. Collectively, we deployed a semi-high throughput and robust methodology to  
27 investigate anti-inflammatory properties of new chemical probes.

## 28 **Highlights**

- 29 • Inhibitors for MEK decreased PGE<sub>2</sub> and TXB<sub>2</sub> production  
30 • Inhibitors for MEK and ERK decreased IL-8 secretion  
31 • JAK inhibitor tofacitinib increased PGE<sub>2</sub> and TXB<sub>2</sub> production

32 **Keywords:** prostaglandin E<sub>2</sub>, whole blood assay, interleukin-8, inflammation, drug screen

## 33 Introduction

34 Inflammation is a highly controlled immune response to eliminate the cause of tissue injury or infection  
35 and to initiate tissue repair back to homeostasis via resolution [1, 2]. However, inflammation is not  
36 always terminated. Unresolved inflammation causes persistent pain, tissue degeneration, and loss of  
37 function. In particular, inflammatory responses drive many autoimmune diseases [3] and inflammation  
38 is a hallmark of cancer [4]. Thus, there is a great need for new therapies that are anti-inflammatory and  
39 safe.

40 Prostaglandin E<sub>2</sub> (PGE<sub>2</sub>) is a potent lipid mediator of inflammation and immune responses, and PGE<sub>2</sub> is  
41 a central mediator of pain, edema, and cartilage erosion typically observed in the joints of rheumatoid  
42 arthritis patients [5, 6]. In addition, PGE<sub>2</sub> is a promotor of the immunosuppressive tumor  
43 microenvironment with major impact on tumor progression [4, 7, 8]. During inflammation, PGE<sub>2</sub> is  
44 synthesized via conversion of arachidonic acid by cyclooxygenases (COX-1 and COX-2) into unstable  
45 PGH<sub>2</sub> that is further metabolized by the inducible terminal synthase microsomal prostaglandin E  
46 synthase-1 (mPGES-1) to generate PGE<sub>2</sub>. Multiple non-steroidal anti-inflammatory drugs (NSAIDs)  
47 exist in clinical practice that unselectively decrease PGE<sub>2</sub> production via inhibition of COX, but these  
48 drugs are all associated with adverse effects. Hence, selective inhibition of PGE<sub>2</sub> production with small  
49 molecule inhibitors could therefore be a desirable therapeutic strategy in inflammation and cancer [9].

50 Interleukin-8 (IL-8) is a potent chemoattractant and activator of neutrophils. IL-8 signalling is implicated  
51 in multiple chronic inflammatory diseases [10] and cancer [11]. For example, a recent meta-analysis  
52 concluded that patients suffering from systemic lupus erythematosus (SLE) have increased levels of  
53 circulating IL-8 [12]. Patients with central neuropsychiatric SLE have increased concentration of IL-8  
54 in cerebrospinal fluid compared to patients with non-central neuropsychiatric SLE [13]. IL-8 is also  
55 associated with renal damage and pulmonary fibrosis in SLE patients [14, 15]. Given that IL-8 is a  
56 stimulant for neutrophil activation, which plays a significant role in the pathogenesis of SLE [16],  
57 targeting IL-8 secretion or signalling could constitute a therapeutic strategy for SLE. A similar role of  
58 neutrophils and net formation has been reported in patients with dermatomyositis [17, 18]. In cancer,  
59 IL-8 is highly expressed in several types of cancer tissues [19] and serum concentration of IL-8  
60 correlates with tumour burden [20]. The tumour-favouring actions of IL-8 include promotion of  
61 angiogenesis, increased survival of cancer stem cells, and attraction of myeloid cells that endorse the  
62 immunosuppressive tumour microenvironment [20].

63 In this study, we aimed to evaluate the effect of 57 chemical probes, high-quality tool compounds, and  
64 relevant control drugs on eicosanoid production and IL-8 secretion in human whole blood. A chemical  
65 probe is defined as "... a selective small-molecule modulator of a protein's function that allows the user  
66 to ask mechanistic and phenotypic questions about its molecular target in biochemical, cell-based or  
67 animal studies" [21], and these compounds follow the criteria of *in vitro* potency (IC<sub>50</sub> or K<sub>d</sub> <100 nM),

68 high selectivity versus other protein subfamilies (>30-fold), and on-target cell activity at 1  $\mu$ M. The  
69 chemical probes and other high-quality tool compounds included are mainly epigenetic modulators and  
70 kinase inhibitors that were produced in academic collaborations or donated by pharmaceutical  
71 companies within the Structural Genomic Consortium (SGC, [www.thesgc.org](http://www.thesgc.org)), which aims to  
72 investigate novel targets for drug development in open science and in collaboration with the  
73 pharmaceutical industry. These inhibitors were tested here at one concentration (in triplicates, n=4-15  
74 donors) based on previous knowledge of binding affinities and toxicity *in vitro*, as assessed using other  
75 validated assays in our laboratories (<https://ultra-dd.org/tissue-platforms/cell-assay-datasets>).

## 76 **Materials and methods**

### 77 **Ethical approval and consent to participate**

78 Ethical approval for this study was granted by local research ethics committee at Karolinska University  
79 hospital (Dnr 02-196) and the Regional Ethical Review Board in Stockholm (Dnr 2015/2001-31/2). Full  
80 informed consent according to the Declaration of Helsinki was obtained from all patients.

### 81 **Collection of blood**

82 Peripheral venous blood was drawn from 10 females and 6 males, aged between 27 and 81 years. Healthy  
83 controls (n=4) and two patient groups were included: systemic lupus erythematosus (n=9) and  
84 dermatomyositis (n=3). The blood was collected in tubes containing sodium heparin (1000 U/mL).

### 85 **Inhibitors**

86 The inhibitors (chemical probes and other high-quality tool compounds) tested here were obtained  
87 through the SGC ([www.thesgc.org](http://www.thesgc.org)) and supplied by different distributors (**Supplementary Table 1**).  
88 Inhibitors and control drugs (**Supplementary Table 1**) were reconstituted at 10 mM in DMSO (D2250,  
89 Sigma-Aldrich), aliquoted in Eppendorf tubes or 96-well plates, and kept at -80°C. A fresh aliquot was  
90 used at each experiment. Diclofenac (dual COX-1/2 inhibitor) was used as positive control for inhibition  
91 of prostanoid production. LPS (L6529, Sigma-Aldrich) was reconstituted in PBS (D8537, Sigma-  
92 Aldrich) to a final concentration of 0.1 mg/mL and kept at +8°C.

### 93 **Whole blood assay**

94 Inhibitors and vehicle control (DMSO) were diluted in PBS at room temperature with no direct light on.  
95 The treatments were prepared in 25  $\mu$ L portions to U-shaped 96-well plate and 200  $\mu$ L of freshly drawn  
96 heparin blood (<2 hrs at room temperature) was added to the plate. The plate was incubated at 37°C for  
97 30 min and then 25  $\mu$ L of 0.1 mg/mL LPS in PBS was added followed by pipetting up and down 3 times  
98 (final concentration of LPS was 10  $\mu$ g/mL). The tested concentration for inhibitor was 0.1 or 1  $\mu$ M  
99 (**Supplementary Table 1**). The plate was incubated for 24 hrs at 37°C and then centrifuged at 3000 g for  
100 10 min at 4°C. Working on ice, 100  $\mu$ L plasma was recovered to a new plate (for prostanoid profiling)

101 and from this 20  $\mu$ L was transferred to a second plate (for IL-8 quantification). The plates were sealed  
102 with aluminum foil and stored at  $-80^{\circ}\text{C}$ .

### 103 **Extraction of lipids**

104 Plasma samples (80-240  $\mu$ L) were thawed on ice and spiked with 50  $\mu$ L deuterated internal standard  
105 mix containing 17 ng 6-keto-PGF<sub>1 $\alpha$</sub> -d4, 8 ng PGF<sub>2 $\alpha$</sub> -d4, 12 ng PGE<sub>2</sub>-d4, 8 ng PGD<sub>2</sub>-d4, 8 ng TXB<sub>2</sub>-d4,  
106 and 8 ng 15-deoxy- $\Delta$ 12,14PGJ<sub>2</sub>-d4 (Cayman Chemical Company) prepared in 100% methanol. Protein  
107 precipitation was performed by addition of 800  $\mu$ L 100% methanol, followed by vortexing, and  
108 centrifugation at 3000 g for 10 min at  $4^{\circ}\text{C}$ . The supernatants were collected in a new plate and evaporated  
109 under vacuum for 4 hrs. The evaporated samples (100-200  $\mu$ L) were diluted to 1 mL with 0.05% formic  
110 acid in water and then loaded onto Oasis HLB 1cc 30mg plate (Waters Corporation, USA) that had been  
111 pre-conditioned with 1 mL of 100% methanol and 1 mL of 0.05% formic acid in water. The plate was  
112 washed with 10% methanol, 0.05% formic acid in water and lipids were eluted with 100% methanol.  
113 The eluates were dried under vacuum over-night and stored at  $-20^{\circ}\text{C}$  until reconstituted in 50  $\mu$ L of 20%  
114 acetonitrile in water prior to analysis with liquid chromatography tandem mass spectrometry (LC-  
115 MS/MS).

### 116 **Lipid profiling by LC-MS/MS**

117 Lipids were quantified in negative mode with multiple reaction monitoring method, using a triple  
118 quadrupole mass spectrometer (Acquity TQ detector, Waters) equipped with an Acquity H-class UPLC  
119 (Waters). Eicosanoid were purchased from Cayman Chemicals and individually optimized for based on  
120 precursor ion m/z, cone voltage, collision energy, and fragment ion m/z (**Supplementary Table 2**). An  
121 eicosanoid mix containing all standards of interest was used to check interference in the LC-MS/MS  
122 analysis. LPC(14:0) and LPC(18:0) were used to set optimal analytical parameters for quantification of  
123 LPCs. Separation of lipids was performed on a 50 x 2.1 mm Acquity UPLC BEH C18 column 1.7  $\mu$ m  
124 (Waters) with a 12 min stepwise linear gradient (20-95%) at a flowrate of 0.6 mL/min with 0.05% formic  
125 acid in acetonitrile as mobile phase B and 0.05% formic acid in water as mobile phase A. Data were  
126 analyzed using MassLynx software, version 4.1, with internal standard calibration and quantification to  
127 external standard curves for prostanoids. LPCs were normalized as area-% within each injection. Only  
128 lipids with peaks intensities of signal-to-noise greater than 10 (S/N >10) were considered in our data  
129 analysis.

### 130 **Quantification of IL-8**

131 IL-8 was quantified in plasma by Human IL-8 (CXCL8) ELISA development kit (3560-1H, Mabtech)  
132 according to manufacturer's instructions.

### 133 **Statistical analyses**

134 Data are presented as mean±SEM if not stated otherwise. Statistical analyses were performed using  
135 GraphPad Prism 6 (GraphPad Software). One sample t-test was used to test significant difference.  
136 Statistical significance level was set to  $p < 0.05$ .

## 137 **Results**

### 138 **Development of whole blood assay**

139 The whole blood assay was developed to screen for changes in multiple eicosanoids. Each eicosanoid  
140 and corresponding deuterated variant were individually optimized in the LC-MS/MS analysis. A dilution  
141 curve containing 6-keto PGF<sub>1α</sub>-d4, PGE<sub>2</sub>-d4, PGD<sub>2</sub>-d4, PGF<sub>2α</sub>-d4, TXB<sub>2</sub>-d4, 15d-PGJ<sub>2</sub>-d4, LTB<sub>4</sub>-d4,  
142 LTC<sub>4</sub>-d5, LTD<sub>4</sub>-d5, 5-HETE-d8, 12-HETE-d8, 15-HETE-d8, and undeuterated variants of 13-HODE,  
143 RvD1, RvD2, 17-hydroxy DHA, and protectin DX was spiked into 100 μL plasma at different stages  
144 throughout the extraction. A dilution curve was spiked in water at the same step. The dilution curve  
145 ranged from 0.006-1.5 pmol as final amount injected on the column in the LC-MS/MS analysis. This  
146 enabled us to investigate the lower limit of quantification (LLOQ), recovery efficacy, and matrix effect  
147 for each eicosanoid. The LLOQ injected on column was considered as great (0.02-0.05 pmol), good  
148 (0.1-0.2 pmol), or poor (0.4-1.5 pmol). Eicosanoids with great LLOQ were PGE<sub>2</sub>, PGF<sub>2α</sub>, TXB<sub>2</sub>, RvD1,  
149 RvD2, LTB<sub>4</sub>, protectin DX, and 13-HODE; good LLOQ were 6-keto PGF<sub>1α</sub>, PGD<sub>2</sub>, 5-HETE, 15-HETE,  
150 and LTD<sub>4</sub>; poor LLOQ were 15d-PGJ<sub>2</sub>, 12-HETE, 17-hydroxy DHA, and LTC<sub>4</sub>. The extraction recovery  
151 rates were 33-125%. The response in plasma compared to 20% acetonitrile were 52-116% due to matrix  
152 effects. The estimated LLOQ in 100 μL plasma was approximately 1 ng/mL for the best performing  
153 eicosanoids including PGE<sub>2</sub>, TXB<sub>2</sub>, PGF<sub>2α</sub>, RvD1, RvD2, and protectin DX. We can conclude that the  
154 method provided similar quantitative performance in plasma for many eicosanoids.

155 LPS at 0.1-10 μg/mL increased PGE<sub>2</sub> and TXB<sub>2</sub> production in human whole blood, which are the two  
156 dominant eicosanoids produced under these conditions [22]. All other eicosanoids were below the  
157 LLOQ. We chose 10 μg/mL of LPS as our final concentration, yielding a robust amount of PGE<sub>2</sub> (49±4  
158 ng/mL, n=5 donors) and TXB<sub>2</sub> (24±9 ng/mL, n=5 donors). The prostanoid production was completely  
159 blocked using the dual COX-1/2 inhibitor diclofenac (10 μM). High concentration of DMSO (0.1%)  
160 slightly decreased PGE<sub>2</sub> production by 20% (n=2 donors) while DMSO at 0.01% or 0.001% had no  
161 effect. The intra-assay coefficient of variation (CV, n=20 technical replicates) was 12% and 11% for  
162 PGE<sub>2</sub> and TXB<sub>2</sub>, respectively. The inter-assay CV for control material (n=3 donors) was 20% for PGE<sub>2</sub>  
163 and 30% for TXB<sub>2</sub>. This was performed on blood that was drawn, incubated, extracted, and analyzed at  
164 separate occasions. The suppression in signal due to matrix effects and/or recovery efficiency varied  
165 between donors and experiments, ranging from 10-70% suppression compared to signal in extracted  
166 blank (mean ± SD, n=6 donors, PGE<sub>2</sub>: 45±25%, TXB<sub>2</sub>: 40±20%). In summary, 24 hrs incubation of  
167 whole blood with 10 μg/mL LPS resulted in profound induction of the COX-1/2 products PGE<sub>2</sub> and  
168 TXB<sub>2</sub> that was efficiently blocked by diclofenac at 10 μM.

## 169 **Effect on PGE<sub>2</sub> and TXB<sub>2</sub> production**

170 Our screening of inhibitors suggested that selected kinase inhibitors affected prostanoid production  
171 (**Figure 1**). The strongest reduction in PGE<sub>2</sub> production was observed by MEK-1 inhibitor PD0325901  
172 (31±6%, p=0.001, n=4) and MEK-1/2 inhibitor trametinib (34±7%, p<0.0001, n=15). Moderate  
173 suppression in PGE<sub>2</sub> concentration was found for MEK-1/2 inhibitor selumetinib (65±9%, p=0.02, n=5),  
174 ERK-1/2 inhibitor SCH772984 (76±11%, p=0.04, n=13) and p38 inhibitor skepinone-L (76±8%,  
175 p=0.01, n=13). However, the tested p38 inhibitor pamapimod did not affect PGE<sub>2</sub> production. Two of  
176 these compounds decreased TXB<sub>2</sub> production, namely trametinib (63±6%, p=0.02, n=15) and  
177 selumetinib (74±7%, p=0.02, n=5). Diclofenac, here used as a positive control for inhibition of  
178 prostanoid production, blocked the prostanoid production while selective COX-2 inhibitor NS-398  
179 inhibited only PGE<sub>2</sub> production, in agreement with previously reported data for these compounds in  
180 whole blood assay [23]. The JAK inhibitor tofacitinib increased both PGE<sub>2</sub> (286±51%, p=0.01, n=6)  
181 and TXB<sub>2</sub> (169±20%, p=0.02, n=6) production. The IRAK-1/4 inhibitor I slightly increased the  
182 concentrations of PGE<sub>2</sub> (139±15%, p=0.04, n=7) and TXB<sub>2</sub> (133±8%, p=0.008, n=7).

183 We chose to investigate the strongest observed effects in more detail by performing concentration-  
184 response experiments for PD0325901, trametinib, selumetinib, and tofacitinib. All three MEK inhibitors  
185 showed a concentration-dependent response on both PGE<sub>2</sub> and TXB<sub>2</sub> production while tofacitinib  
186 showed a concentration-dependent response on PGE<sub>2</sub> production (**Figure 2**).

## 187 **Effect on IL-8 secretion**

188 In line with the effect on prostanoid production, reduction in IL-8 secretion was found for PD0325901  
189 (24±9%, p=0.03, n=3), trametinib (27±5%, p<0.0001, n=13), and selumetinib (45±10%, p=0.03, n=3)  
190 (**Figure 3**). Moderate reduction in IL-8 secretion was found for SCH772984 (62±9%, p=0.002, n=12)  
191 and diclofenac (66±8%, p=0.003, n=11). We could also observe that tofacitinib increased IL-8 secretion  
192 (225±57%, p=0.16, n=3), however not with statistical significance.

## 193 **Effect on LPC profile**

194 We measured LPC species within our targeted LC-MS/MS analysis. LPCs are mainly generated by  
195 metabolism of membrane phosphatidylcholine by cytosolic phospholipase A<sub>2</sub> [24]. These lipids have  
196 been reported to be involved in several cellular processes; sometimes with opposing effect depending  
197 on degree of saturation, concentration, and biological context [25, 26]. We observed no difference in  
198 total LPC or LPC profile when whole blood was treated with LPS neither did any of the tested inhibitors  
199 alter the LPC profile (**Figure 4**).

## 200 **Discussion**

201 We have tested the inhibitory effect on prostanoid production and IL-8 secretion in human whole blood  
202 for 57 high-quality inhibitors with known target specificities and *in vitro* potencies. None of the tested

203 epigenetic modulators, which are acting on demethylases, bromodomains, or methyltransferases,  
204 affected PGE<sub>2</sub> or IL-8 concentration. Inhibition of MEK-1/2 or ERK decreased PGE<sub>2</sub> production and  
205 IL-8 secretion in this assay. This effect was observed for allosteric inhibitor trametinib (MEK-1/2), non  
206 ATP-competitive inhibitors PD0325901 (MEK-1) and selumetinib (MEK-1/2), and ATP-competitive  
207 inhibitor SCH772984 (ERK-1/2). These kinase targets are part of the RAS/RAF/MEK/ERK signaling  
208 transduction pathway, where inhibition of MEK prevents the downstream phosphorylation and  
209 activation of ERK that ultimately regulates cellular responses such as survival, lipid metabolism, and  
210 protein translation [27]. For example, MEK-1/2 inhibitor PD184352 decreased PGE<sub>2</sub> production in  
211 melanoma cell line by decreased COX-2 expression due to inhibition of phosphorylation on ERK [28]  
212 and trametinib reduced IL-8 production in melanoma cell line [29]. We found that our positive control  
213 diclofenac for blocking prostanoid production decreased IL-8 secretion, which is explained by the fact  
214 that PGE<sub>2</sub> stimulates IL-8 production in cultured cells [30-33]. While our study mainly focused on  
215 identifying inhibitory effects, we observed that JAK inhibitor tofacitinib increased both PGE<sub>2</sub>  
216 production and IL-8 secretion. Tofacitinib is used to treat rheumatoid arthritis and it is known that  
217 tofacitinib can increase the expression of pro-inflammatory mediators, including PGE<sub>2</sub>, in macrophages  
218 by acting inhibitory on the expression of anti-inflammatory IL-10 [34]. The increased formation of pro-  
219 inflammatory PGE<sub>2</sub> and platelet activating thromboxane A<sub>2</sub> (as measured by stable metabolite TXB<sub>2</sub>) in  
220 human whole blood may be associated with the recently recognized increased risk of thromboembolism  
221 associated with JAK inhibitors in treatment of rheumatoid arthritis [35]. We acknowledge that the  
222 limitation of our study is the usage of one concentration per tested inhibitor. However, the used  
223 concentrations were based on reported IC<sub>50</sub> and/or EC<sub>50</sub> values as well as solid experiences in our  
224 laboratories using other validated assay systems ([https://ultra-dd.org/index.php/tissue-platforms/cell-](https://ultra-dd.org/index.php/tissue-platforms/cell-assay-datasets)  
225 [assay-datasets](https://ultra-dd.org/index.php/tissue-platforms/cell-assay-datasets)). We also demonstrated in concentration-response experiments that greater inhibitory  
226 effect could be achieved by increasing the concentration for the MEK inhibitors. However, this increases  
227 the risk of off-target effects and/or introduction of cellular toxicity that needs to be taken into account  
228 in experimental design and interpretation of results. In conclusion, we identified inhibitors for MEK or  
229 ERK as anti-inflammatory hits in our human whole blood assay. Based on the suppression in PGE<sub>2</sub>  
230 production and IL-8 secretion, further investigation of the MEK/ERK signaling pathway may inform  
231 future therapeutic strategies to treat inflammatory diseases such as SLE and dermatomyositis.

## 232 **Acknowledgements**

233 This work was supported by grants from Innovative Medicines Initiative (EU/EFPIA, ULTRA-DD,  
234 grant no: 115766), the Swedish Research Council (grant no: 2017-02577), Stockholm County Council  
235 (ALF, grant no: 20160378), The Swedish Rheumatism Association (grant no: R-755861), King Gustaf  
236 V's 80 Years Foundation (grant no: n/a), and funds from Karolinska Institutet (grant no: n/a).

## 237 **Conflicts of interests**

238 The SGC receives funds from AbbVie, Bayer Pharma, Boehringer Ingelheim, the Canada Foundation  
239 for Innovation, the Eshelman Institute for Innovation, Genome Canada, Janssen, Merck (Darmstadt,  
240 Germany), MSD, Novartis Pharma, the Ontario Ministry of Economic Development and Innovation,  
241 Pfizer, the São Paulo Research Foundation, Takeda and the Wellcome Trust (authors: F.B., Y.S., M.M.,  
242 M.S., P-J.J., and L.B.). These funders had no direct role in study conceptualization, design, data  
243 collection, analysis, decision to publish, or preparation of the manuscript. P-J.J. is engaged in Gesynta  
244 Pharma AB, a company that develops anti-inflammatory drugs. I.G. and I.L. have no conflicts of  
245 interests to declare.

#### 246 **Author contributions**

247 F.B., Y.S., M.S., P-J.J., and L.B. contributed to study conception and design. F.B., Y.S., and M.M.  
248 performed experiments. F.B. analysed data, performed statistical analysis, and drafted the manuscript.  
249 I.G. and I.L. facilitated administrative, technical, or material support. All authors critically revised and  
250 approved the final version of the manuscript.

#### 251 **References**

- 252 [1] C. Nathan, Points of control in inflammation, *Nature*, 420 (2002) 846-852.  
253 [2] C.D. Buckley, D.W. Gilroy, C.N. Serhan, B. Stockinger, P.P. Tak, The resolution of inflammation,  
254 *Nat Rev Immunol*, 13 (2013) 59-66.  
255 [3] I.B. McInnes, G. Schett, The pathogenesis of rheumatoid arthritis, *The New England journal of*  
256 *medicine*, 365 (2011) 2205-2219.  
257 [4] D. Hanahan, R.A. Weinberg, Hallmarks of cancer: the next generation, *Cell*, 144 (2011) 646-674.  
258 [5] J. Akaogi, T. Nozaki, M. Satoh, H. Yamada, Role of PGE2 and EP receptors in the pathogenesis of  
259 rheumatoid arthritis and as a novel therapeutic strategy, *Endocr Metab Immune Disord Drug Targets*,  
260 6 (2006) 383-394.  
261 [6] M.J. Fattahi, A. Mirshafiey, Prostaglandins and rheumatoid arthritis, *Arthritis*, 2012 (2012)  
262 239310.  
263 [7] D. Wang, R.N. Dubois, Eicosanoids and cancer, *Nature reviews. Cancer*, 10 (2010) 181-193.  
264 [8] E. Ricciotti, G.A. FitzGerald, Prostaglandins and inflammation, *Arteriosclerosis, thrombosis, and*  
265 *vascular biology*, 31 (2011) 986-1000.  
266 [9] F. Bergqvist, R. Morgenstern, P.J. Jakobsson, A review on mPGES-1 inhibitors: From preclinical  
267 studies to clinical applications, *Prostaglandins & other lipid mediators*, (2019) 106383.  
268 [10] R.C. Russo, C.C. Garcia, M.M. Teixeira, F.A. Amaral, The CXCL8/IL-8 chemokine family and  
269 its receptors in inflammatory diseases, *Expert Rev Clin Immunol*, 10 (2014) 593-619.  
270 [11] D.J. Waugh, C. Wilson, The interleukin-8 pathway in cancer, *Clinical cancer research : an official*  
271 *journal of the American Association for Cancer Research*, 14 (2008) 6735-6741.  
272 [12] Y.M. Mao, C.N. Zhao, L.N. Liu, Q. Wu, Y.L. Dan, D.G. Wang, H.F. Pan, Increased circulating  
273 interleukin-8 levels in systemic lupus erythematosus patients: a meta-analysis, *Biomark Med*, 12  
274 (2018) 1291-1302.  
275 [13] T. Yoshio, H. Okamoto, K. Kurasawa, Y. Dei, S. Hirohata, S. Minota, IL-6, IL-8, IP-10, MCP-1  
276 and G-CSF are significantly increased in cerebrospinal fluid but not in sera of patients with central  
277 neuropsychiatric lupus erythematosus, *Lupus*, 25 (2016) 997-1003.  
278 [14] L.C. Lit, C.K. Wong, L.S. Tam, E.K. Li, C.W. Lam, Raised plasma concentration and ex vivo  
279 production of inflammatory chemokines in patients with systemic lupus erythematosus, *Ann Rheum*  
280 *Dis*, 65 (2006) 209-215.  
281 [15] A. Nielepkowicz-Gozdzinska, W. Fendler, E. Robak, L. Kulczycka-Siennicka, P. Gorski, T.  
282 Pietras, E. Brzezianska, A. Antczak, Exhaled IL-8 in systemic lupus erythematosus with and without  
283 pulmonary fibrosis, *Arch Immunol Ther Exp (Warsz)*, 62 (2014) 231-238.



- 284 [16] M.J. Kaplan, Neutrophils in the pathogenesis and manifestations of SLE, *Nature reviews.*  
285 *Rheumatology*, 7 (2011) 691-699.
- 286 [17] S. Zhang, X. Shu, X. Tian, F. Chen, X. Lu, G. Wang, Enhanced formation and impaired  
287 degradation of neutrophil extracellular traps in dermatomyositis and polymyositis: a potential  
288 contributor to interstitial lung disease complications, *Clinical and experimental immunology*, 177  
289 (2014) 134-141.
- 290 [18] Y. Peng, S. Zhang, Y. Zhao, Y. Liu, B. Yan, Neutrophil extracellular traps may contribute to  
291 interstitial lung disease associated with anti-MDA5 autoantibody positive dermatomyositis, *Clin*  
292 *Rheumatol*, 37 (2018) 107-115.
- 293 [19] J.M. David, C. Dominguez, D.H. Hamilton, C. Palena, The IL-8/IL-8R Axis: A Double Agent in  
294 Tumor Immune Resistance, *Vaccines (Basel)*, 4 (2016).
- 295 [20] C. Alfaro, M.F. Sanmamed, M.E. Rodriguez-Ruiz, A. Teijeira, C. Onate, A. Gonzalez, M. Ponz,  
296 K.A. Schalper, J.L. Perez-Gracia, I. Melero, Interleukin-8 in cancer pathogenesis, treatment and  
297 follow-up, *Cancer treatment reviews*, 60 (2017) 24-31.
- 298 [21] C.H. Arrowsmith, J.E. Audia, C. Austin, J. Baell, J. Bennett, J. Blagg, C. Bountra, P.E. Brennan,  
299 P.J. Brown, M.E. Bunnage, C. Buser-Doepner, R.M. Campbell, A.J. Carter, P. Cohen, R.A. Copeland,  
300 B. Cravatt, J.L. Dahlin, D. Dhanak, A.M. Edwards, M. Frederiksen, S.V. Frye, N. Gray, C.E.  
301 Grimshaw, D. Hepworth, T. Howe, K.V. Huber, J. Jin, S. Knapp, J.D. Kotz, R.G. Kruger, D. Lowe,  
302 M.M. Mader, B. Marsden, A. Mueller-Fahrnow, S. Muller, R.C. O'Hagan, J.P. Overington, D.R.  
303 Owen, S.H. Rosenberg, B. Roth, R. Ross, M. Schapira, S.L. Schreiber, B. Shoichet, M. Sundstrom, G.  
304 Superti-Furga, J. Taunton, L. Toledo-Sherman, C. Walpole, M.A. Walters, T.M. Willson, P.  
305 Workman, R.N. Young, W.J. Zuercher, The promise and peril of chemical probes, *Nat Chem Biol*, 11  
306 (2015) 536-541.
- 307 [22] L.L. Mazaleuskaya, J.A. Lawson, X. Li, G. Grant, C. Mesaros, T. Grosser, I.A. Blair, E. Ricciotti,  
308 G.A. FitzGerald, A broad-spectrum lipidomics screen of antiinflammatory drug combinations in  
309 human blood, *JCI Insight*, 1 (2016).
- 310 [23] K. Larsson, J. Steinmetz, F. Bergqvist, S. Arefin, L. Spahiu, J. Wannberg, S.C. Pawelzik, R.  
311 Morgenstern, P. Stenberg, K. Kublickiene, M. Korotkova, P.J. Jakobsson, Biological characterization  
312 of new mPGES-1 inhibitors in preclinical models of inflammation and vascular tone, *British journal of*  
313 *pharmacology*, (2019).
- 314 [24] J.E. Burke, E.A. Dennis, Phospholipase A2 structure/function, mechanism, and signaling, *Journal*  
315 *of lipid research*, 50 Suppl (2009) S237-242.
- 316 [25] A. Drzazga, A. Sowinska, M. Koziolkiewicz, Lysophosphatidylcholine and  
317 lysophosphatidylinositol--novel promising signaling molecules and their possible therapeutic activity,  
318 *Acta poloniae pharmaceutica*, 71 (2014) 887-899.
- 319 [26] I. Sevastou, E. Kaffe, M.A. Mouratis, V. Aidinis, Lysoglycerophospholipids in chronic  
320 inflammatory disorders: the PLA(2)/LPC and ATX/LPA axes, *Biochimica et biophysica acta*, 1831  
321 (2013) 42-60.
- 322 [27] J.A. McCubrey, L.S. Steelman, W.H. Chappell, S.L. Abrams, E.W. Wong, F. Chang, B.  
323 Lehmann, D.M. Terrian, M. Milella, A. Tafuri, F. Stivala, M. Libra, J. Basecke, C. Evangelisti, A.M.  
324 Martelli, R.A. Franklin, Roles of the Raf/MEK/ERK pathway in cell growth, malignant transformation  
325 and drug resistance, *Biochimica et biophysica acta*, 1773 (2007) 1263-1284.
- 326 [28] S. Zelenay, A.G. van der Veen, J.P. Bottcher, K.J. Snelgrove, N. Rogers, S.E. Acton, P.  
327 Chakravarty, M.R. Girotti, R. Marais, S.A. Quezada, E. Sahai, C. Reis e Sousa, Cyclooxygenase-  
328 Dependent Tumor Growth through Evasion of Immunity, *Cell*, 162 (2015) 1257-1270.
- 329 [29] M.L. Hartman, M. Rozanski, M. Osrodek, I. Zalesna, M. Czyz, Vemurafenib and trametinib  
330 reduce expression of CTGF and IL-8 in (V600E)BRAF melanoma cells, *Laboratory investigation; a*  
331 *journal of technical methods and pathology*, 97 (2017) 217-227.
- 332 [30] I. Venza, M. Visalli, C. Fortunato, M. Ruggeri, S. Ratone, M. Caffo, G. Caruso, C. Alafaci, F.  
333 Tomasello, D. Teti, M. Venza, PGE2 induces interleukin-8 derepression in human astrocytoma  
334 through coordinated DNA demethylation and histone hyperacetylation, *Epigenetics*, 7 (2012) 1315-  
335 1330.
- 336 [31] S. Caristi, G. Piraino, M. Cucinotta, A. Valenti, S. Loddo, D. Teti, Prostaglandin E2 induces  
337 interleukin-8 gene transcription by activating C/EBP homologous protein in human T lymphocytes,  
338 *The Journal of biological chemistry*, 280 (2005) 14433-14442.

- 339 [32] H. Aso, S. Ito, A. Mori, M. Morioka, N. Suganuma, M. Kondo, K. Imaizumi, Y. Hasegawa,  
340 Prostaglandin E2 enhances interleukin-8 production via EP4 receptor in human pulmonary  
341 microvascular endothelial cells, *American journal of physiology. Lung cellular and molecular*  
342 *physiology*, 302 (2012) L266-273.
- 343 [33] A. Agro, C. Langdon, F. Smith, C.D. Richards, Prostaglandin E2 enhances interleukin 8 (IL-8)  
344 and IL-6 but inhibits GM-CSF production by IL-1 stimulated human synovial fibroblasts in vitro, *The*  
345 *Journal of rheumatology*, 23 (1996) 862-868.
- 346 [34] P. Kothari, R. Pestana, R. Mesraoua, R. Elchaki, K.M. Khan, A.J. Dannenberg, D.J. Falcone, IL-  
347 6-mediated induction of matrix metalloproteinase-9 is modulated by JAK-dependent IL-10 expression  
348 in macrophages, *Journal of immunology*, 192 (2014) 349-357.
- 349 [35] I.C. Scott, S.L. Hider, D.L. Scott, Thromboembolism with Janus Kinase (JAK) Inhibitors for  
350 Rheumatoid Arthritis: How Real is the Risk?, *Drug Saf*, 41 (2018) 645-653.

## 351 **Figure Legends**

352 **Figure 1.** Volcano plots showing effects on PGE<sub>2</sub> (A) and TXB<sub>2</sub> (B) production in LPS-induced human  
353 whole blood. The top altered conditions compared to vehicle control based on fold-change (<0.5 or >2)  
354 and p-value (<0.05) are highlighted. Each inhibitor was tested in 4-15 donors. Statistical significance  
355 was tested using one sample t-test (p<0.05).

356 **Figure 2.** Validation of inhibitory effect on PGE<sub>2</sub> production by MEK inhibitors in human whole blood.  
357 Diclofenac at 10 μM was used as positive control. Data are presented as mean±SD of biological  
358 replicates (n=2-6 per condition) from one representative experiment. The absolute PGE<sub>2</sub> production in  
359 LPS control was 53.3±8.3 ng/mL. The concentration-response was tested in two donors.

360 **Figure 3.** Volcano plot showing effects on IL-8 secretion in LPS-induced human whole blood. The top  
361 altered conditions compared to vehicle control based on fold-change (<0.5 or >2) and p-value (<0.05)  
362 are highlighted. Each inhibitor was tested in 3-13 donors. Statistical significance was tested using one  
363 sample t-test (p<0.05).

364 **Figure 4.** Effect on LPC profile in whole blood. There was no difference in total LPC (A) or LPC profile  
365 (B) with LPS treatment, and none of the tested compounds affected the LPC profile (C). Each inhibitor  
366 was tested in 4-15 donors.

## 367 **Supplementary material**

368 **Supplementary Table S1.**

369 **Supplementary Table S2.**

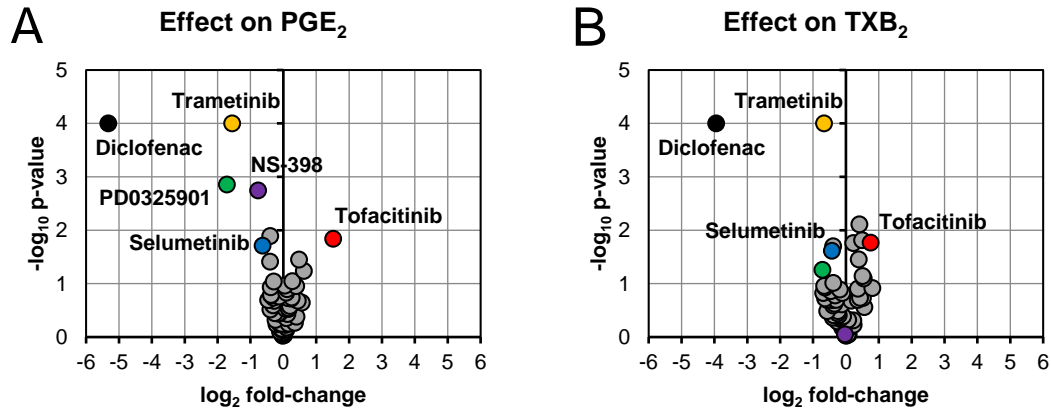

Figure 1.

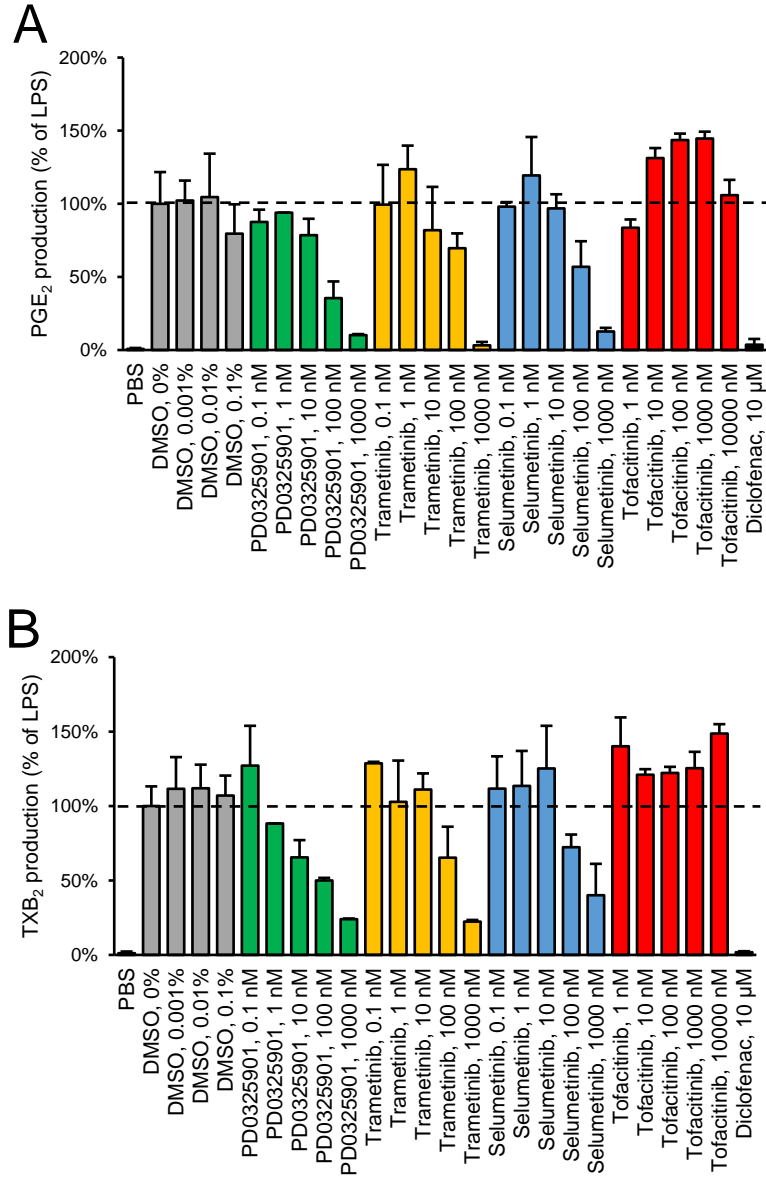

**Figure 2.**

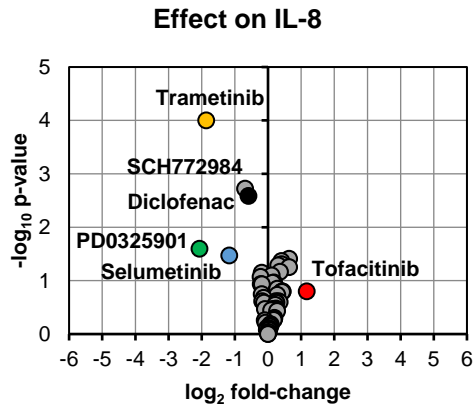

**Figure 3.**

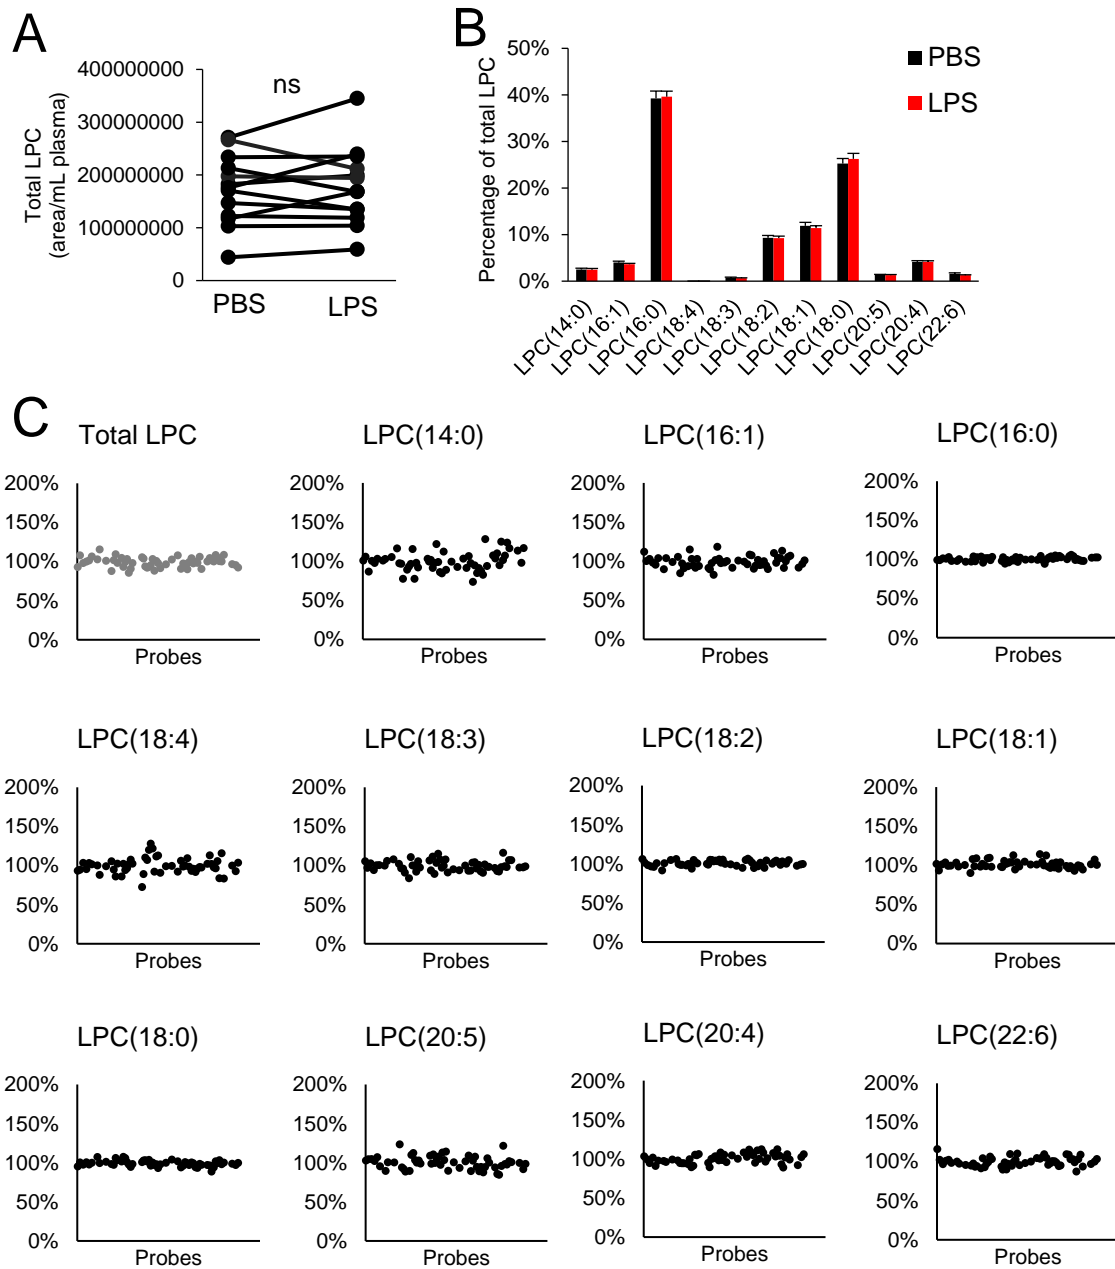

**Figure 4.**
